# Supplementary material for: Quantifying cereal crop movement through hemispherical video analysis of agricultural plots
Source: Plant Methods. 2019 May 24;15:55. doi: 10.1186/s13007-019-0437-5 (PMC6533727; doi:10.1186/s13007-019-0437-5)
Supplement: Supplementary file 8 — Additional file 8. FieldCoordinates7. Field Coordinates file for 25 Apr 2017 planting date [file 13007_2019_437_MOESM8_ESM.csv]

2.378608924	4	21.5	5	21.5	4	22.5	5	22.5
2.739501312	2	21.5	3	21.5	2	22.5	3	22.5
2.477034121	0	21.5	1	21.5	0	22.5	1	22.5
2.854330709	-1	21.5	0	21.5	-1	22.5	0	22.5
2.362204724	-3	21.5	-2	21.5	-3	22.5	-2	22.5
2.296587927	-5	21.5	-4	21.5	-5	22.5	-4	22.5
2.296587927	-5	6.5	-4	6.5	-5	7.5	-4	7.5
2.427821522	-3	6.5	-2	6.5	-3	7.5	-2	7.5
2.985564304	-1	6.5	0	6.5	-1	7.5	0	7.5
2.362204724	0	6.5	1	6.5	0	7.5	1	7.5
2.706692913	2	6.5	3	6.5	2	7.5	3	7.5
2.312992126	4	6.5	5	6.5	4	7.5	5	7.5
3.083989501	4	-7.5	5	-7.5	4	-6.5	5	-6.5
2.378608924	2	-7.5	3	-7.5	2	-6.5	3	-6.5
2.230971129	0	-7.5	1	-7.5	0	-6.5	1	-6.5
2.526246719	-1	-7.5	0	-7.5	-1	-6.5	0	-6.5
2.395013123	-3	-7.5	-2	-7.5	-3	-6.5	-2	-6.5
2.49343832	-5	-7.5	-4	-7.5	-5	-6.5	-4	-6.5
2.411417323	-5	-22.5	-4	-22.5	-5	-21.5	-4	-21.5
2.80511811	-3	-22.5	-2	-22.5	-3	-21.5	-2	-21.5
3.018372703	-1	-22.5	0	-22.5	-1	-21.5	0	-21.5
2.477034121	0	-22.5	1	-22.5	0	-21.5	1	-21.5
2.772309711	2	-22.5	3	-22.5	2	-21.5	3	-21.5
2.723097113	4	-22.5	5	-22.5	4	-21.5	5	-21.5
